# Supplementary material for: Structural Characterization of the CD44 Stem Region for Standard and Cancer-Associated Isoforms
Source: MDPI journal article supplement (doi:10.3390/ijms21010336), 2020-01-03
Supplement: s1 [file s1]

## Supplementary information

### BLAST results

The best two hit comparison obtained from BLAST

The symbol '#' means the atoms in the pdb file were not successfully solved or missing.

for the standard stem region of CD44s

CD44s : 181 DVSSGSTIEKSTPEGYILHTDLPTS-QPTGDRDDAFFIGSTLAT 223

similarity

4XGU\_A : 83 EN--DLTINPSNIHVYKLHKDGPLS#####SQLWQ 126

                  \*\* \*     \* \*\* \* \* \*                   \* \*

11/43 = 25.58%

CD44s : 181 DVSSGSTIEKSTPEGYILHTDLPTSQPTGDRDDAFFIGSTLAT 223

2DK1\_A : 3 SGSSGRWVEGITSEGYHYYYDLISGASQWEKPEGFQGDLLKTS 45

                 \*\*\* \* \* \*\*\*     \*\*                   \*

11/43 = 25.58%

for the stem of CD44v6

CD44v6 : 181 DVSSGSTIEKSTP--

EGYILHTDLPTSQPTGDRDDAFFIGSTLATWADPNSTTEEAATQKEKWFENEWQGKNPPTPSED SHVT

EGTT 265

3DWL\_A : 183 VVDSGDGVTHIIPVAEGYVIGSSIKT-

MPLAGRDVTYFVQSLLR#####LKTAERIKECCYVCPDIVKEFSRFDR#####LKYA 269

                 \* \*\*             \* \*\*\*             \* \*     \*\* \* \*\*

\*   \*\*             \*

similarity= 18/85 = 21.18%

CD44v6 : 181 DVSSGSTIEKSTPEGYILHTDLPTSQPTGD-----

RDDAFFIGSTLATWADPNSTTEEAATQKEKWFENEWQGKNPPTPSED SHVTEGTT 265

3LQ1\_A : 276

FLKEAEIIDKLTPEVVIRFGSMPVSKPLKNWLEQLSDIRFYVVDPGAAWKDPIKAVTDMIHC DERFLL

DIMQ-QNMPDDAKDAAWLNGWT 364

                 \* \* \*\*\* \*             \* \* \*             \* \*             \* \* \*\*

\*             \* \* \*     \*             \* \*

similarity= 22/85 =25.88%

**Figure S1** Representative sequence comparison results obtained from BLAST server. An \* (asterisk) indicates positions which have a single, fully conserved residue.

(a)

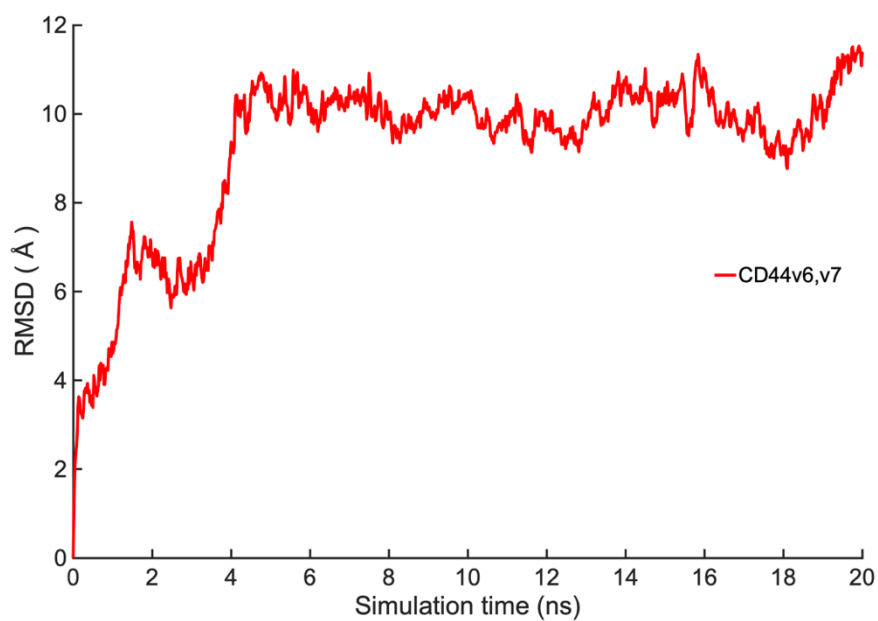

(b)

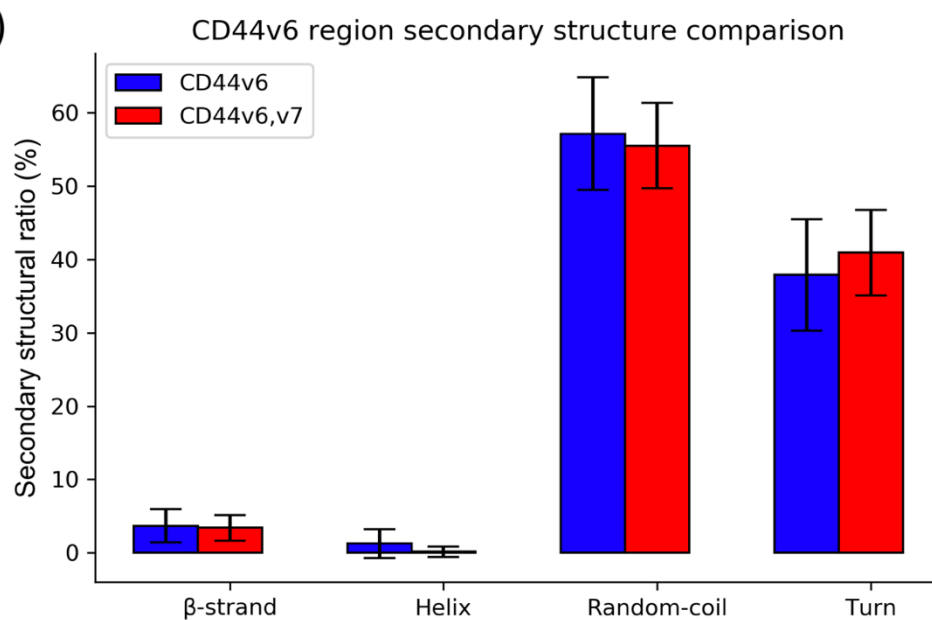

**Figure S2** (a) The RMSD of CD44v6+v7 and (b) secondary structure comparison between CD44v6 and CD44v6+v7.

**Table S1.** Hydrogen bond occupancies for CD44s cluster 1. The hydrogen bonds involved in  $\beta$ -sheets were underlined. (Only occupancies above 35% are shown.)

| Donor                | Acceptor                    | Occupancy (%) |
|----------------------|-----------------------------|---------------|
| <u>HIS199-Main-N</u> | <b><u>PHE215-Main-O</u></b> | <u>88.60%</u> |
| <u>ILE217-Main-N</u> | <u>ILE197-Main-O</u>        | <u>81.58%</u> |
| GLY195-Main-N        | THR192-Main-O               | 64.04%        |
| THR192-Main-N        | TYR196-Main-O               | 50.88%        |
| TYR196-Main-N        | THR192-Side-O               | 50.00%        |
| <u>THR187-Main-N</u> | <u>THR200-Main-O</u>        | <u>43.86%</u> |
| <u>PHE215-Main-N</u> | <u>HIS199-Main-O</u>        | <u>42.98%</u> |
| <u>THR200-Main-N</u> | <u>THR187-Main-O</u>        | <u>40.35%</u> |
| LEU202-Main-N        | GLY185-Main-O               | 39.47%        |
| GLU194-Main-N        | THR192-Side-OG1             | 35.96%        |
| <u>GLU189-Main-N</u> | <u>LEU198-Main-O</u>        | <u>35.09%</u> |

**Table S2.** Hydrogen bond occupancies for CD44s cluster 2 The hydrogen bonds involved in  $\beta$ -sheets were underlined. (Only occupancies above 35% are shown.)

| Donor                | Acceptor                    | Occupancy (%) |
|----------------------|-----------------------------|---------------|
| <u>ILE217-Main-N</u> | <u>SER183-Main-O</u>        | <u>66.67%</u> |
| <u>SER183-Main-N</u> | <b><u>PHE215-Main-O</u></b> | <u>65.71%</u> |
| LEU202-Main-N        | THR200-Side-O               | 51.43%        |

**Table S3.** Hydrogen bond occupancies for CD44v6 cluster 1. The hydrogen bonds involved in  $\beta$ -sheets were underlined. (Only occupancies above 35% are shown.)

|                              | Donor                       | Acceptor                    | Occupancy (%) |
|------------------------------|-----------------------------|-----------------------------|---------------|
| Within standard stem         | GLU194-Main-N               | SER191-Main-O               | 58.73%        |
|                              | GLN206-Main-N               | THR204-Side-O               | 45.63%        |
|                              | GLY209-Main-N               | GLN206-Main-O               | 42.46%        |
|                              | LEU221-Main-N               | GLY218-Main-O               | 40.08%        |
|                              | GLY195-Main-N               | SER191-Side-O               | 38.89%        |
|                              | ALA214-Main-N               | ARG211-Main-O               | 38.89%        |
| Between standard stem and v6 | <u>TRP224-Main-N</u>        | <b><u>PHE215-Main-O</u></b> | <u>75.40%</u> |
|                              | <b><u>PHE215-Main-N</u></b> | <u>TRP224-Main-O</u>        | <u>63.10%</u> |
|                              | TYR196-Main-N               | ASP226-Main-O               | 55.16%        |
| Within variant 6             | GLU245-Main-N               | PHE242-Main-O               | 38.89%        |
|                              | LYS238-Main-N               | THR236-Side-O               | 35.71%        |

**Table S4.** Occupancies of hydrophobic and aromatic contacts with Phe215 (Only occupancies above 35% are shown.)

|                   | Hydrophobic/aromatic residue | Occupancy (%) |
|-------------------|------------------------------|---------------|
| CD44s, cluster 1  | HIS199                       | 63.2%         |
|                   | ILE217                       | 45.6%         |
| CD44s, cluster 2  | VAL182                       | 70.5%         |
|                   | ILE217                       | 60.0%         |
|                   | PRO203                       | 37.1%         |
| CD44v6, cluster 1 | TYR196                       | 68.7%         |
|                   | TRP224                       | 61.1%         |
|                   | ILE197                       | 40.1%         |
|                   | ILE217                       | 40.1%         |

**Table S5** Hydrogen bond occupancies for CD44v6+v7 between standard stem and v6

| Between standard stem and v6 | Donor         | Acceptor      | Occurancy (%) |
|------------------------------|---------------|---------------|---------------|
|                              | TRP224-Main-N | PHE215-Main-O | 96.71         |
|                              | PHE215-Main-N | TRP224-Main-O | 82.73         |
|                              | TYR196-Main-N | ASP226-Main-O | 98.3          |
